# Supplementary material for: Femtosecond laser-scribed superhydrophilic/superhydrophobic self-splitting patterns for one droplet multi-detection
Source: Royal Society of Chemistry journal article supplement (doi:10.1039/d3nr01395b), 2023-01-01
Supplement: d3nr01395b3.pdf [file d3nr01395b3.pdf]

Electronic Supplementary Material (ESI) for Nanoscale.  
This journal is © The Royal Society of Chemistry 2023

## **Femtosecond laser scribed superhydrophilic/superhydrophobic self-splitting pattern for one droplet multidetection**

Qiaoqiao Huang,<sup>a</sup> Kai Yin<sup>\*a,b</sup>, Lingxiao Wang,<sup>a</sup> Qinwen Deng<sup>a</sup> Christopher J. Arnusch<sup>c</sup>

<sup>a</sup> *Hunan Key Laboratory of Nanophotonics and Devices, School of Physics and Electronics, Central South University, Changsha, 410083, China.*

<sup>b</sup> *State Key Laboratory of Precision Manufacturing for Extreme Service Performance, College of Mechanical and Electrical Engineering, Central South University, Changsha 410083, China.*

<sup>c</sup> *Department of Desalination and Water Treatment, Zuckerberg Institute for Water Research, the Jacob Blaustein Institutes for Desert Research, Ben-Gurion University of the Negev, Sede-Boqer Campus, Midreshet Ben-Gurion 84990, Israel*

This file contains Supplementary Experimental Section, Figures S1-S14.

\*To whom correspondence should be addressed.

\*Corresponding author: kaiyin@csu.edu.cn

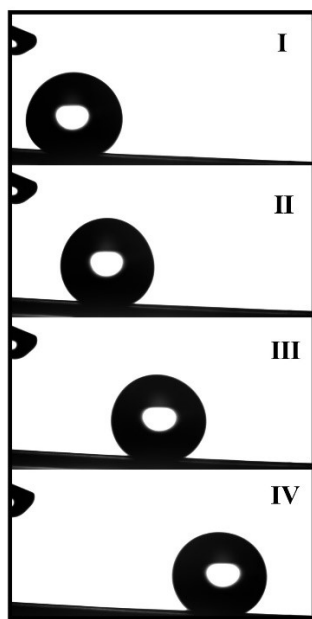

**Fig. S1.** Droplet rolling process. A small rolling-off angle of  $\sim 3^\circ$  of SHB surface.

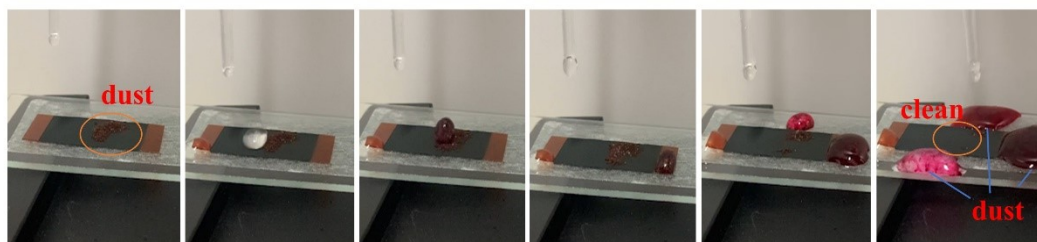

**Fig. S2.** Self-cleaning ability. The dust on the SHB surface can be easily removed by

liquid drops on a slope, showing good self-cleaning ability.

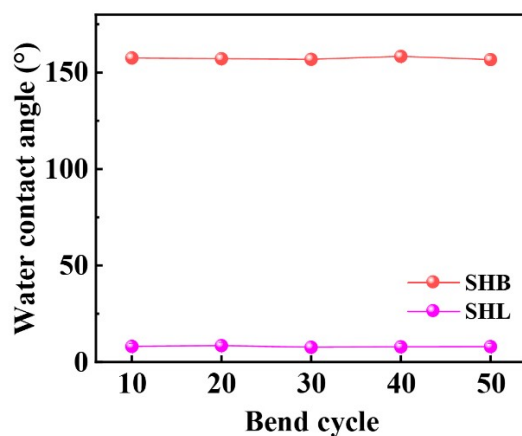

**Fig. S3.** Bend cycle test. The SHB surface and the SHL surface can hold superwettability when 50 band cycles.

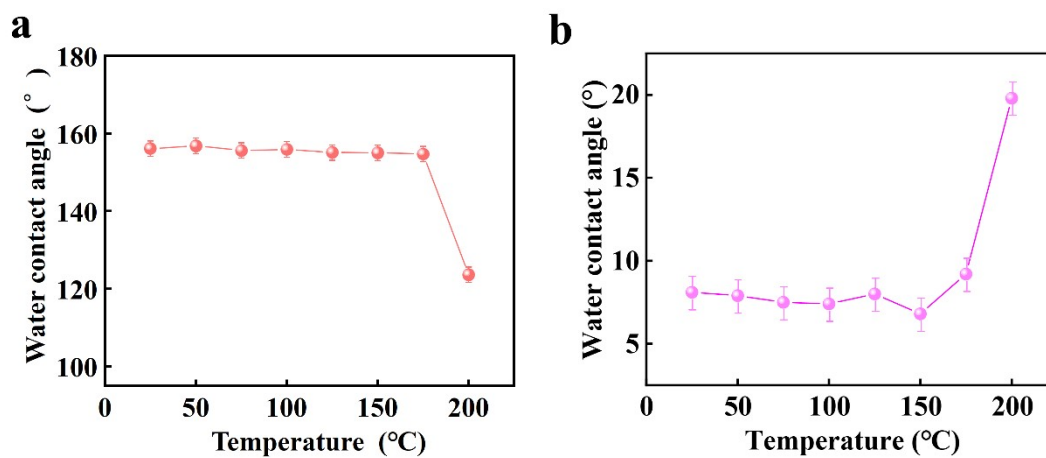

**Fig. S4.** Temperature stability test. The SHB surface has stable superhydrophobic property before 180 °, and the hydrophobicity decreases rapidly after 180 °; The critical temperature for the stability of the same SHL surface wettability is 180 °.

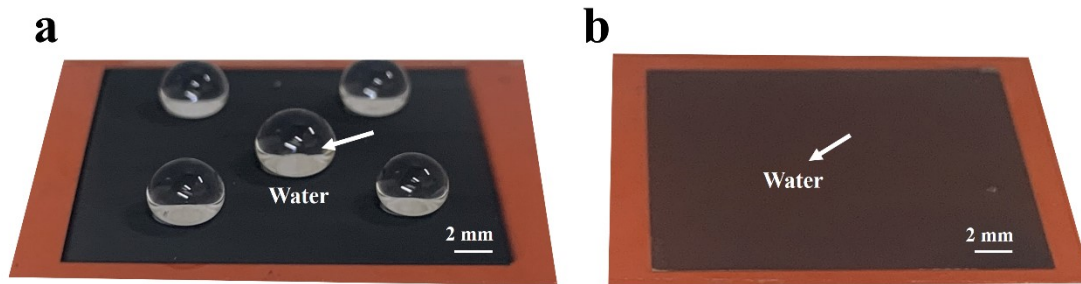

**Fig. S5.** Homogeneity wettability of SHB surface and SHL surface. Drops at five locations on the 25x25 mm large-area SHB surface show the same contact angle; SHL surface droplets spread rapidly and wet the entire surface, indicating the homogeneity of the laser machined surface.

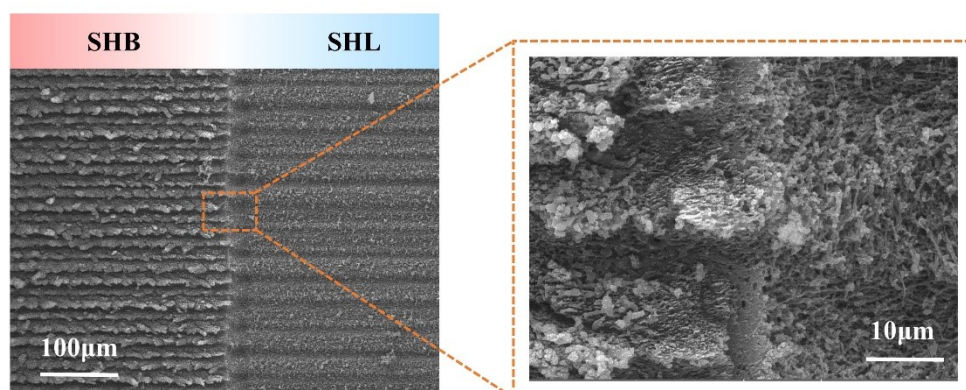

**Fig. S6.** The SEM image of interface surface. In order to observe and compare the rough structure of superhydrophobic surface and superhydrophilic surface more clearly, the picture is the SEM image taken at the interface.

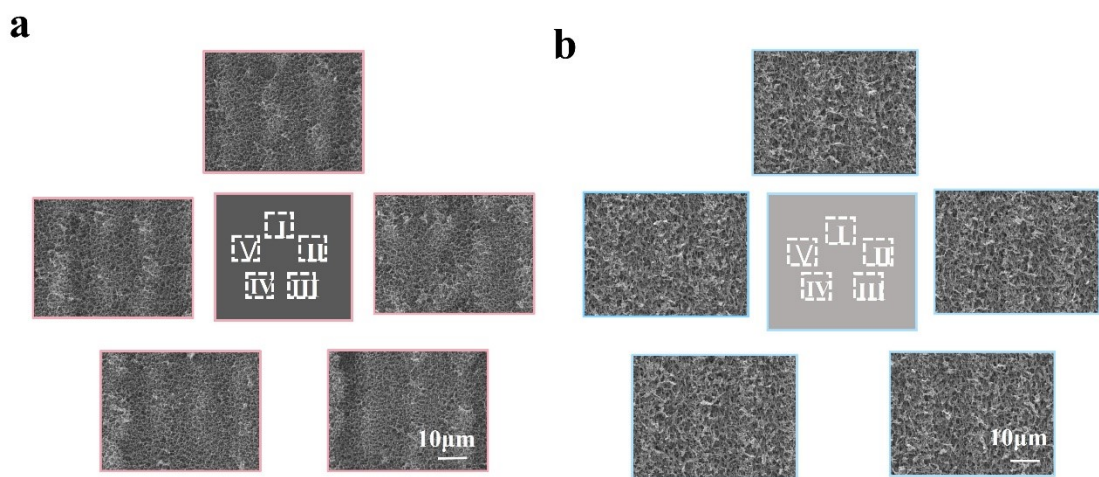

**Fig. S7.** The SEM image of SHB surface and SHL surface. SEM characterization was carried out at five different positions on the SHB surface and SHL surface respectively, a and b can observe the same rough structure at different positions on the two surfaces, indicating the homogeneity of the micro-nano structure.

| Element | Atomic% |
|---------|---------|
| C K     | 64.15   |
| N K     | 11.11   |
| O K     | 24.74   |

**Fig. S8.** The chemical composition of original PI film.

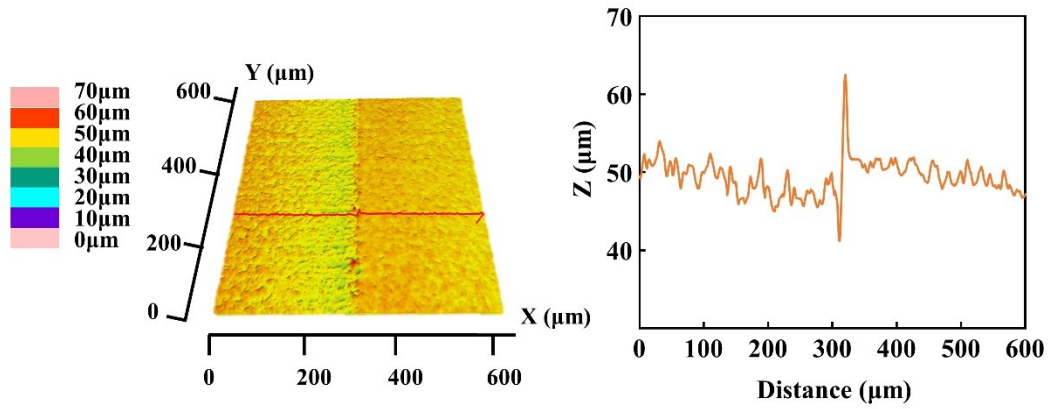

**Fig. S9.** LCM characterization. Through LCM characterization test on the interface of superhydrophobic surface and superhydrophilic surface, obvious roughness contrast can be seen.

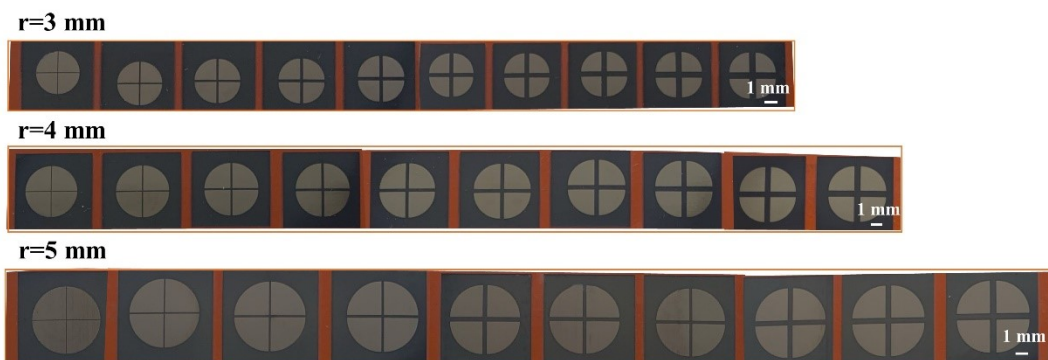

**Fig. S10.** Composite pattern with different parameters. To test the influencing factors of droplet self-splits, we prepared different SHL radius patterns, in which the stripe spacing of each pattern is from 0.1mm to 1.0 mm.

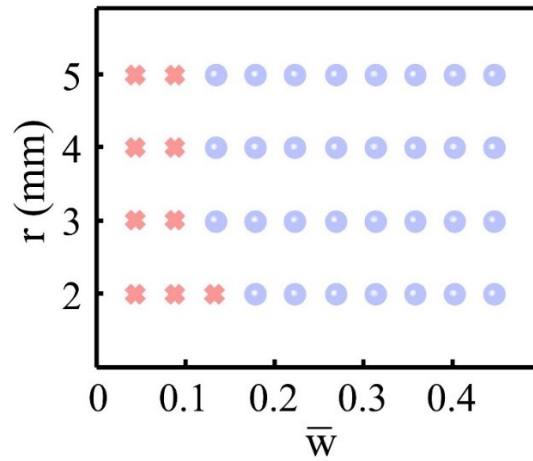

**Fig. S11.** The result of the droplet self-splitting. A droplet with a volume of 6  $\mu\text{L}$  drops at a height of 6 cm.

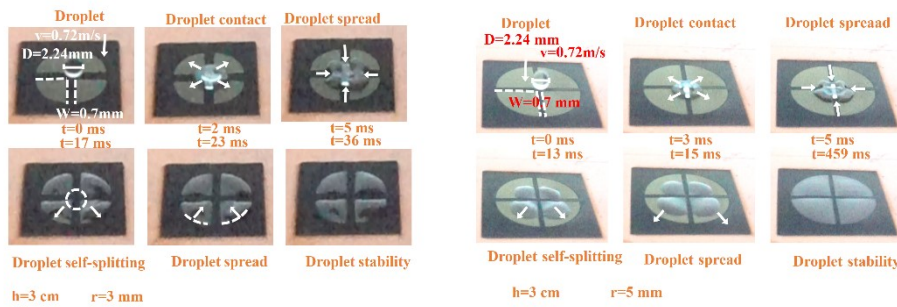

**Fig. S12.** Droplet self-splitting process. The droplet splits itself when the SHL pattern radius is 3 mm and 5 mm respectively. The droplet splits rapidly on the 3 mm radius pattern, and spreads on the surface when it is 5 mm radius pattern, which is affected by the hydrophilic area. To better compare the self-splitting effect, the matching of the droplet diameter and the SHL pattern size is equally important.

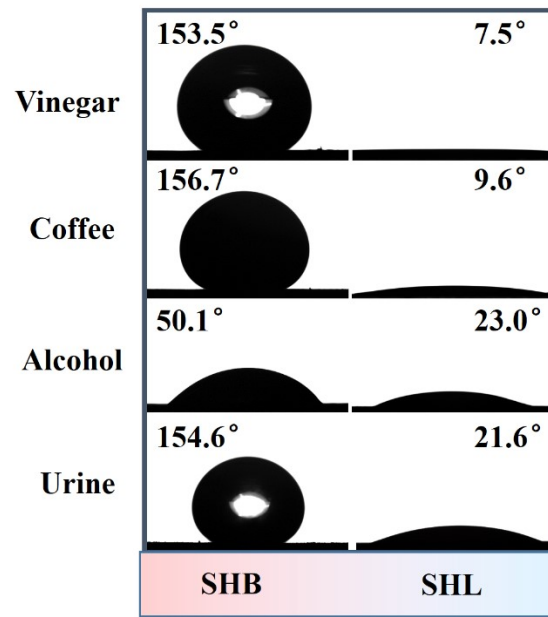

**Fig. S13.** Contact angle photos of various droplets. Test the contact angle between SHB surface and SHL surface for different kinds of droplet splitting

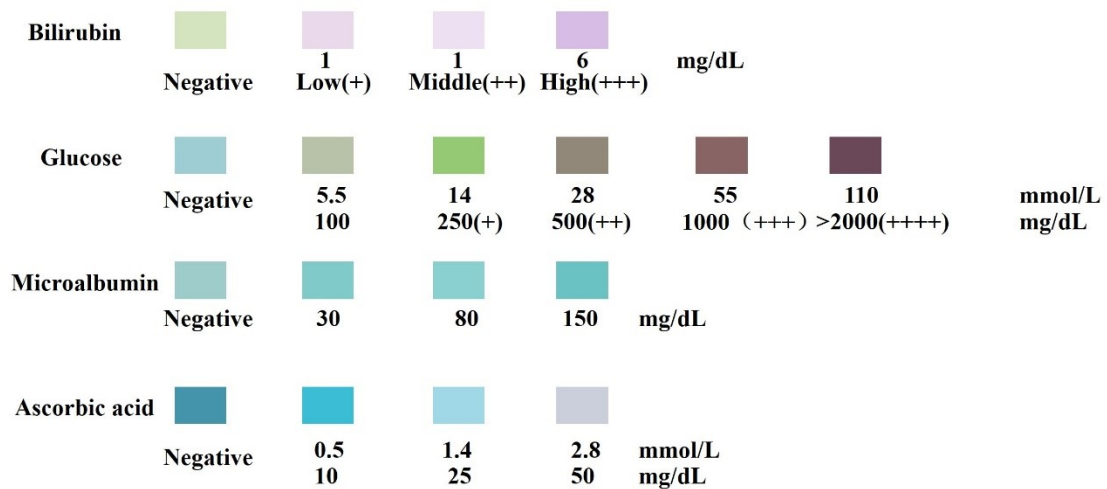

**Fig. S14.** The standard coloristic card.
